# Supplementary material for: Synthesis and preclinical evaluation of a novel fluorine-18 labeled small-molecule PET radiotracer for imaging of CXCR3 receptor in mouse models of atherosclerosis
Source: Springer Nature journal article supplement (doi:10.1186/s13550-023-01017-x), 2023-07-12

# Supplementary Information

## Synthesis and preclinical evaluation of a novel fluorine-18 labeled small-molecule PET radiotracer for imaging of CXCR3 receptor in mouse models of atherosclerosis

Santosh R. Alluri<sup>1†</sup>, Yusuke Higashi<sup>2</sup>, Ashley Berendzen<sup>3</sup>, Laurel A. Grisanti<sup>4</sup>, Lisa D. Watkinson<sup>3</sup>, Kamendra Singh<sup>5</sup>, Timothy J. Hoffman<sup>3</sup>, Terry Carmack<sup>3</sup>, Elizabeth A. Devanny<sup>3</sup>, Miles Tanner<sup>4</sup>, Kun-Eek Kil<sup>1,6\*</sup>

1. University of Missouri Research Reactor, University of Missouri, Columbia, Missouri 65211, USA
2. Department of Medicine, Tulane University School of Medicine, New Orleans, Louisiana 70112, USA
3. Research Service, Harry S. Truman Memorial Veterans' Hospital, Columbia, Missouri 65201, USA
4. Department of Biomedical Sciences, College of Veterinary Medicine, University of Missouri, Columbia, Missouri 65211, USA
5. Bond Life Sciences Center, University of Missouri, Columbia, Missouri 65211, USA
6. Department of Veterinary Medicine and Surgery, College of Veterinary Medicine, University of Missouri, Columbia, Missouri 65211, USA

\* For correspondence:

Kun-Eek Kil: University of Missouri Research Reactor, University of Missouri, 1513 Research Park Drive, Columbia, Missouri 65211, USA, [kilk@missouri.edu](mailto:kilk@missouri.edu), 573-884-7885

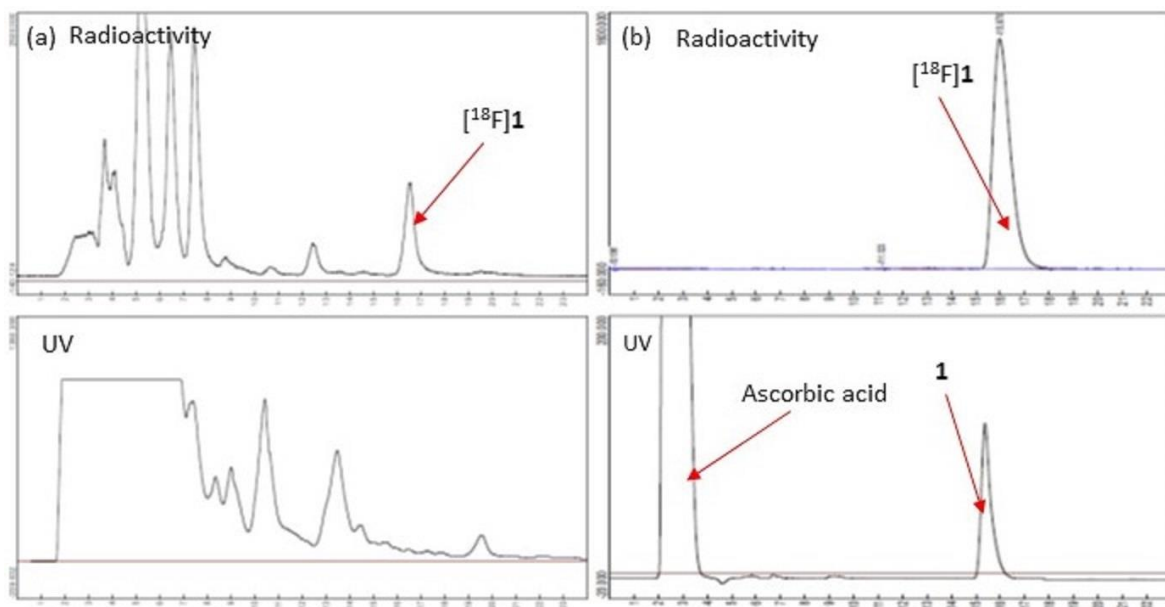

Figure S1. (a) The semi-preparative HPLC of  $[^{18}\text{F}]\mathbf{1}$  and (b) The analytical HPLC of  $[^{18}\text{F}]\mathbf{1}$ . Co-injection of nonradioactive standard  $\mathbf{1}$  confirmed that the collected product was authentic.

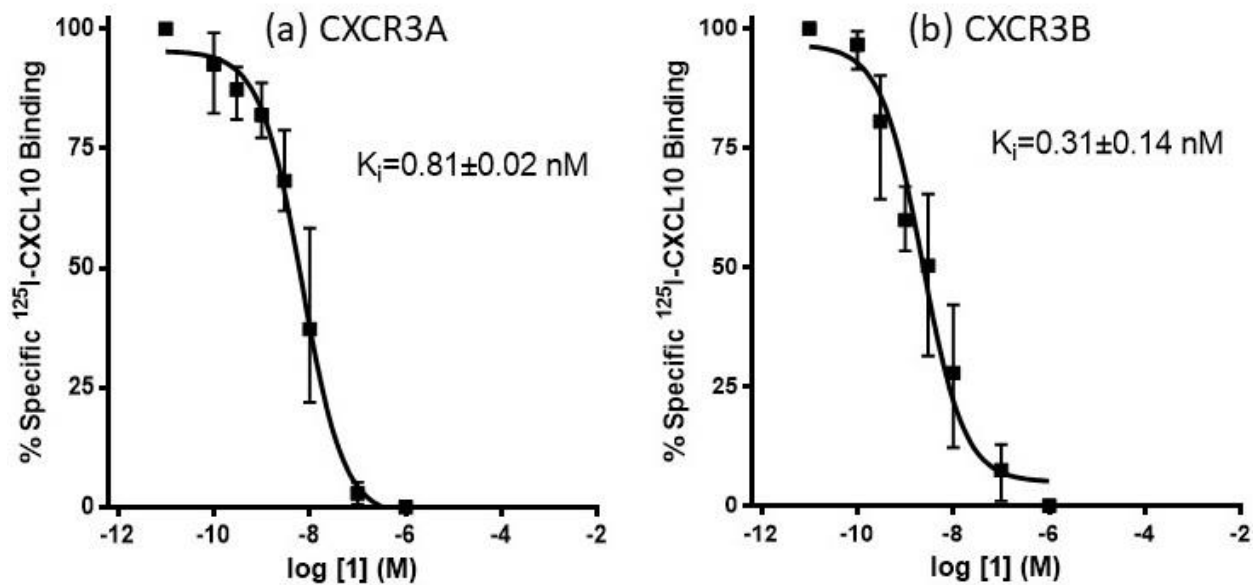

Figure S2. Competitive binding curves of cell-binding assays of compound  $\mathbf{1}$  for (a) CXCR3A and (b) CXCR3B

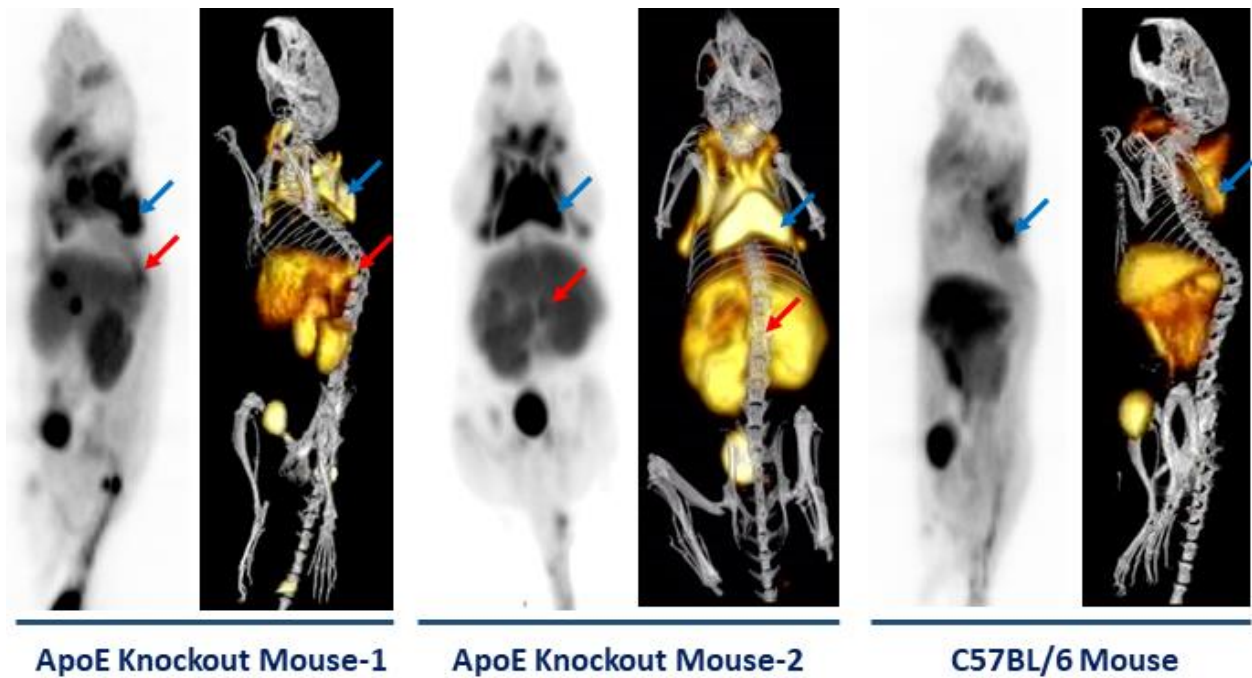

**Figure S3. Baseline PET and PET/CT images of two ApoE knockout mice and a C57BL/6 control mouse presented in Figure 3. Atherosclerotic lesions and brown adipose tissues are indicated by red arrows and blue arrows, respectively.**

Figure S4. NMR and Mass spectra

(a) Methyl (S)-6-(4-(tert-butoxycarbonyl)-3-ethylpiperazin-1-yl)-5-chloronicotinate (4)

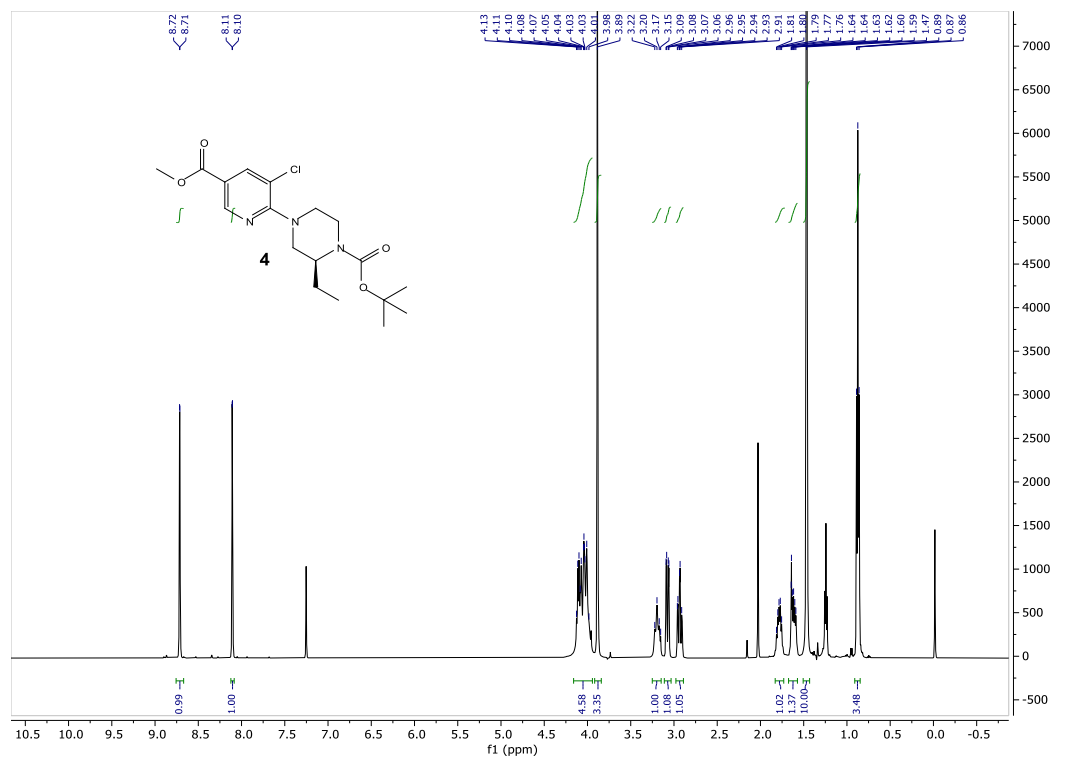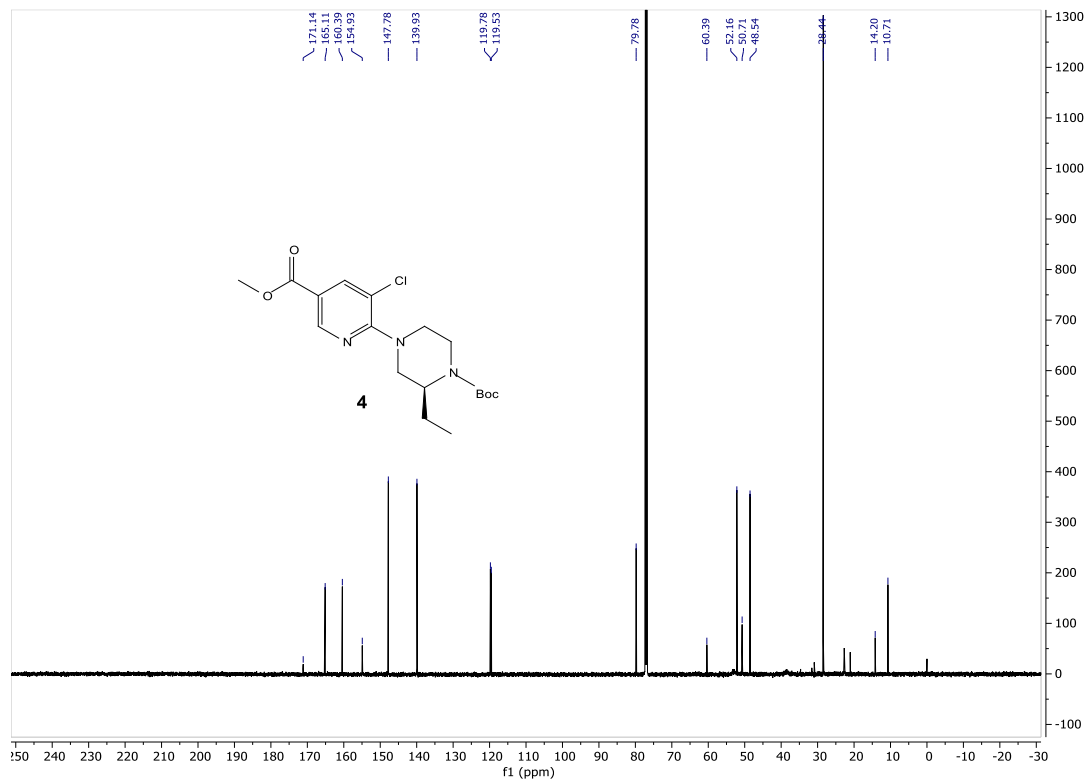

1-K006-001 #64-156 RT: 0.88-2.16 AV: 93 NL: 6.87E7

T: FTMS + p NSI Full ms [120.00-1000.00]

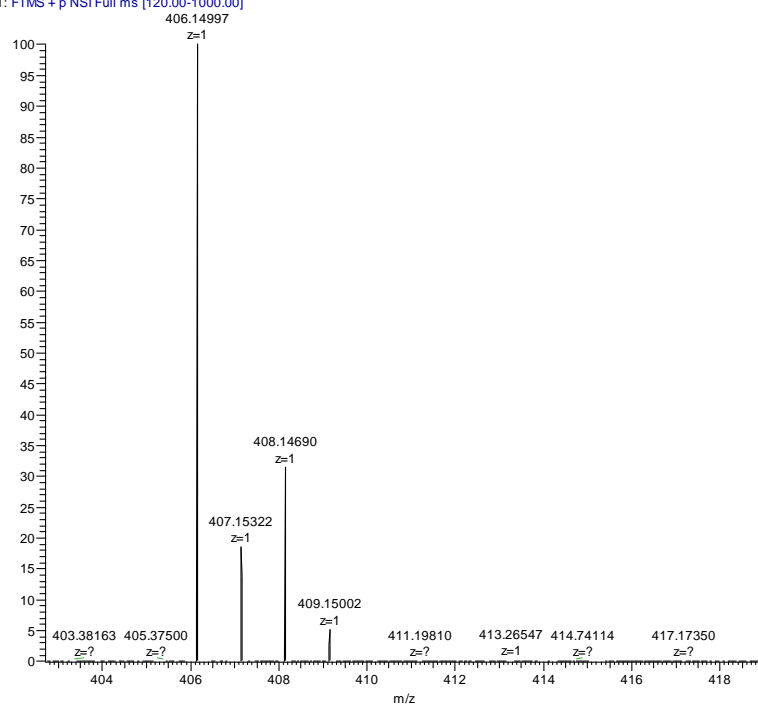

### (b) Methyl (S)-5-chloro-6-(3-ethylpiperazin-1-yl)nicotinate (5)

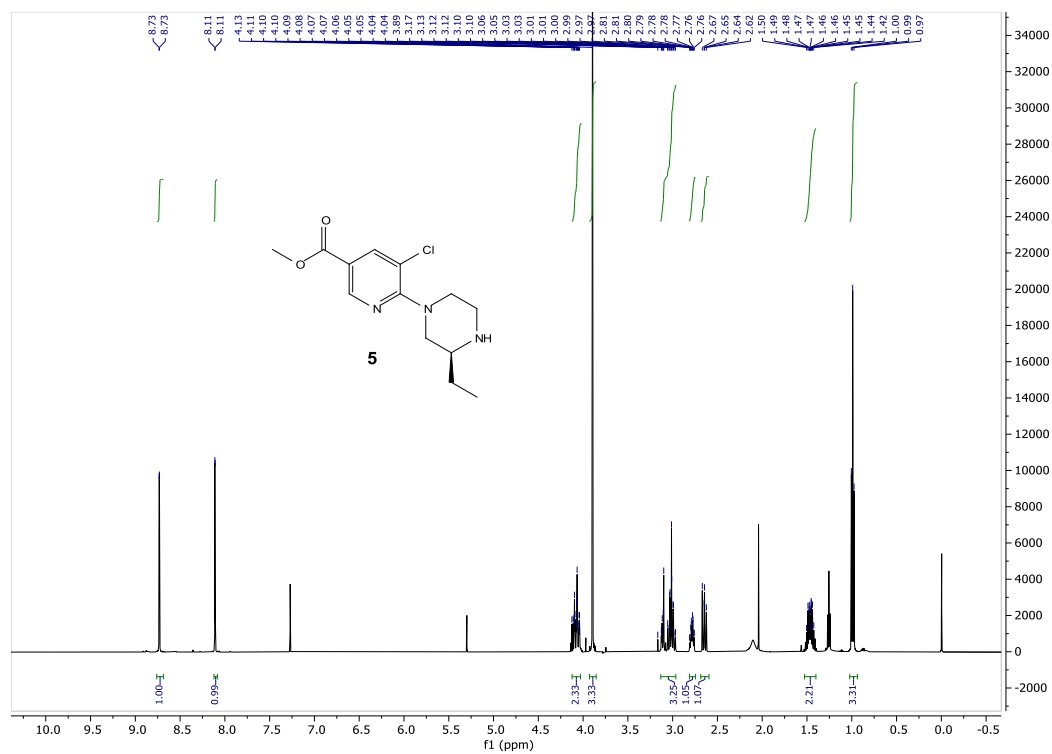

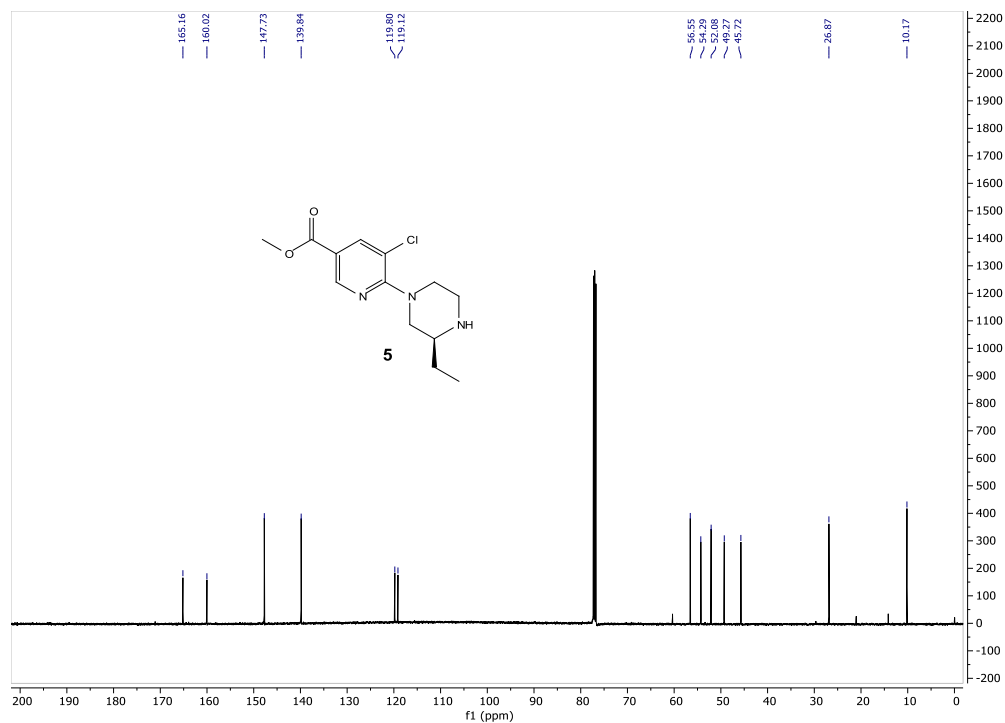

2-K006-004 #1-269 RT: 0.01-2.00 AV: 269 NL: 2.59E8  
 T: FTMS + p NSI Full ms [120.00-1000.00]

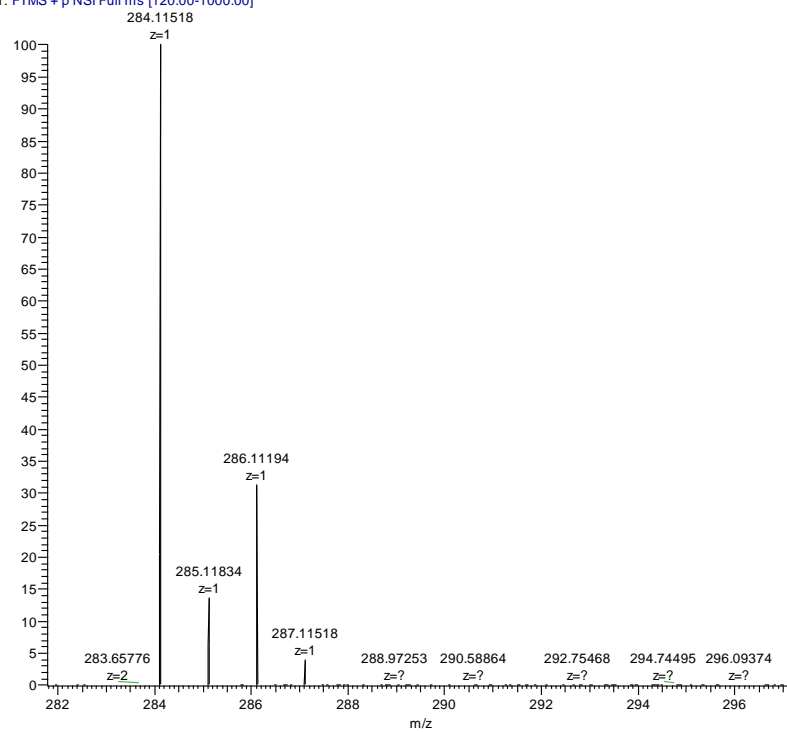

(c) Methyl (S)-6-(4-(1-(tert-butoxycarbonyl)piperidin-4-yl)-3-ethylpiperazin-1-yl)-5-chloronicotinate (7)

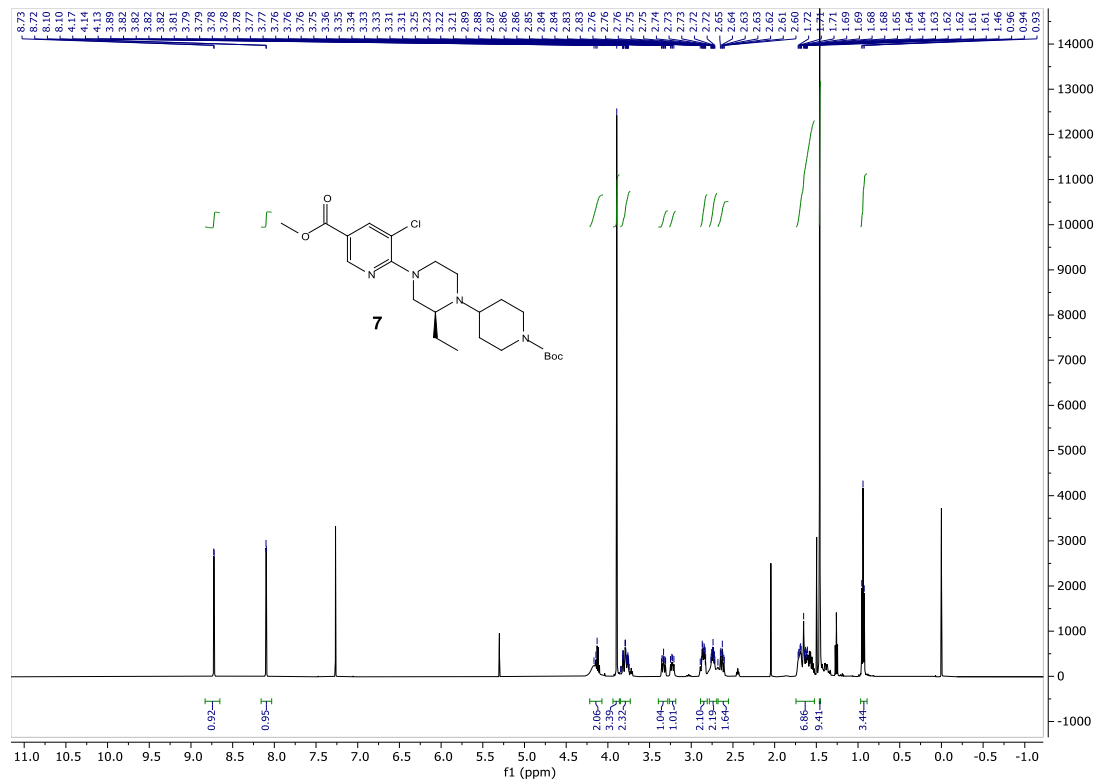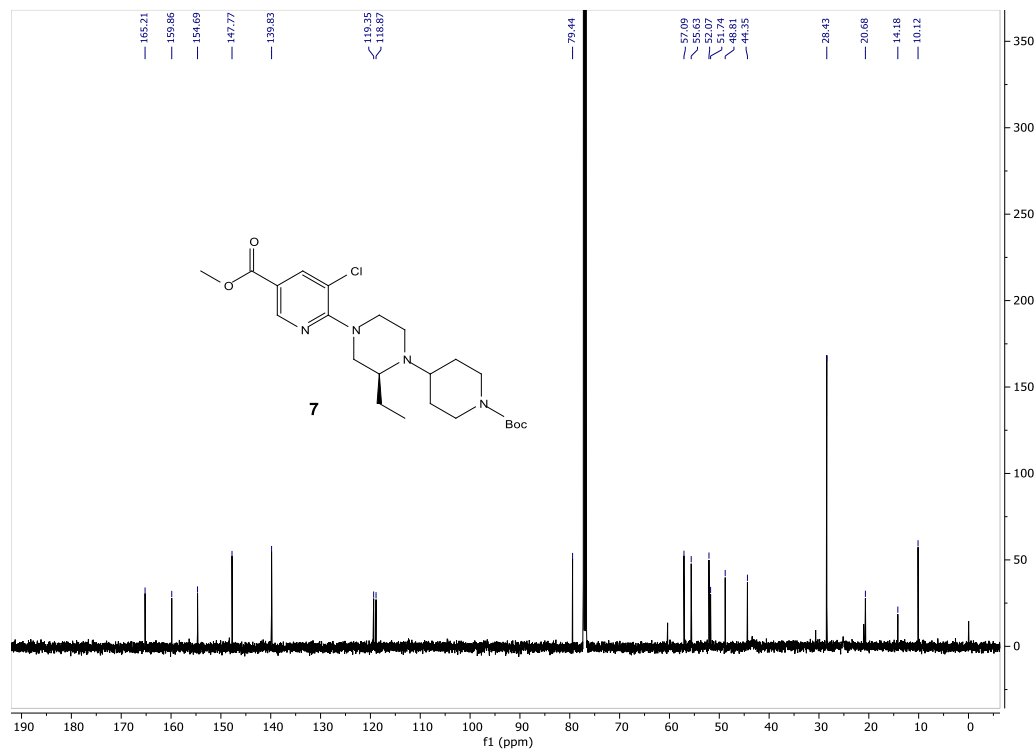





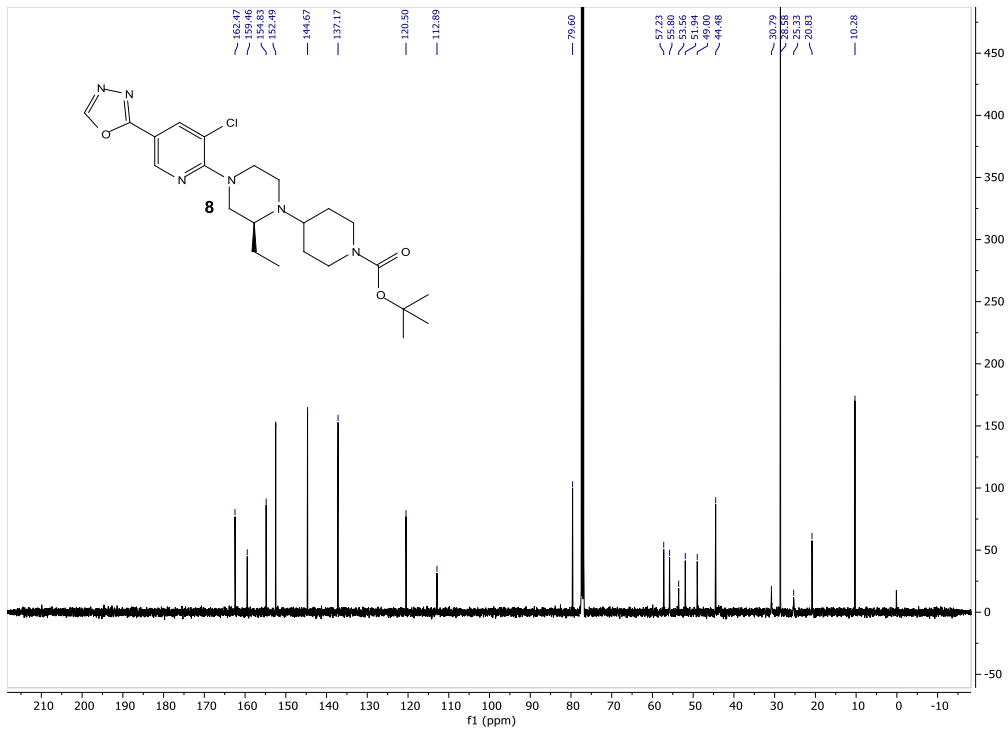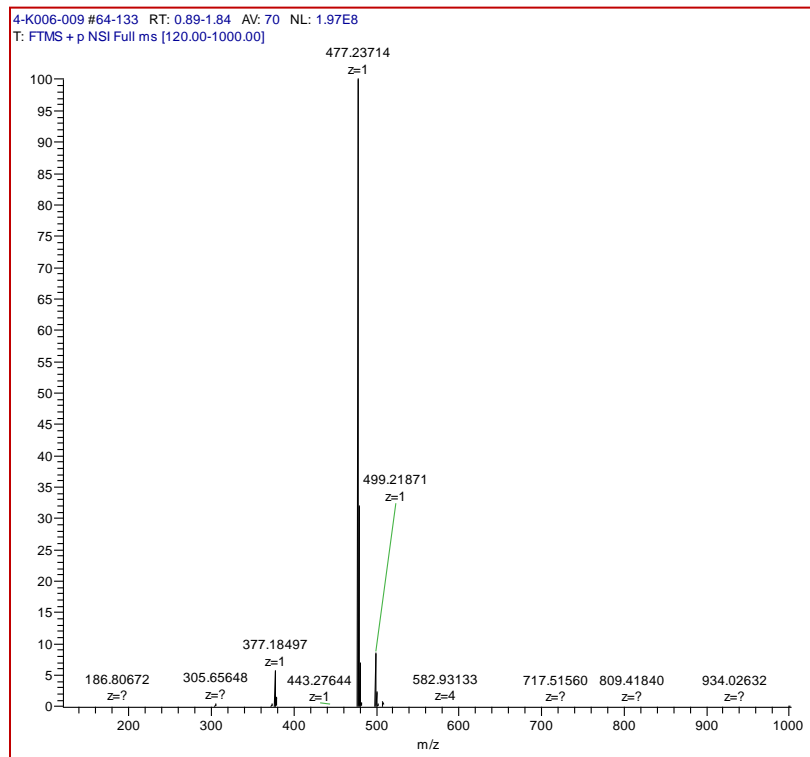

(e) (S)-2-(5-Chloro-6-(3-ethyl-4-(piperidin-4-yl)piperazin-1-yl)pyridin-3-yl)-1,3,4-oxadiazole  
 (9)

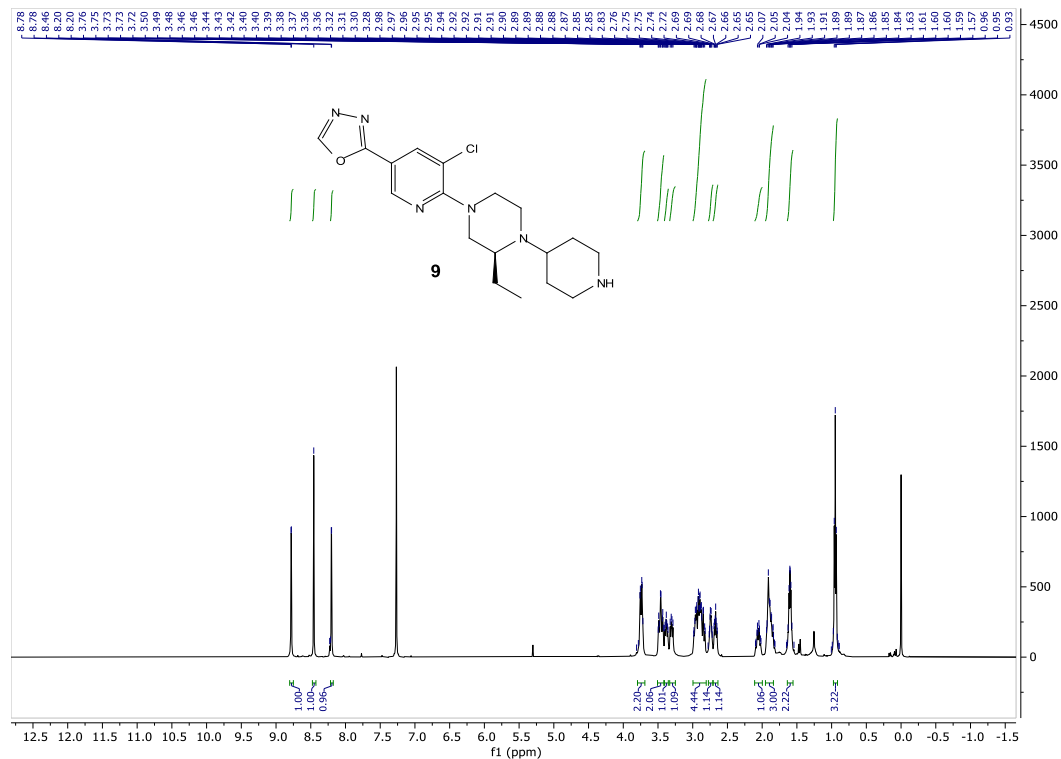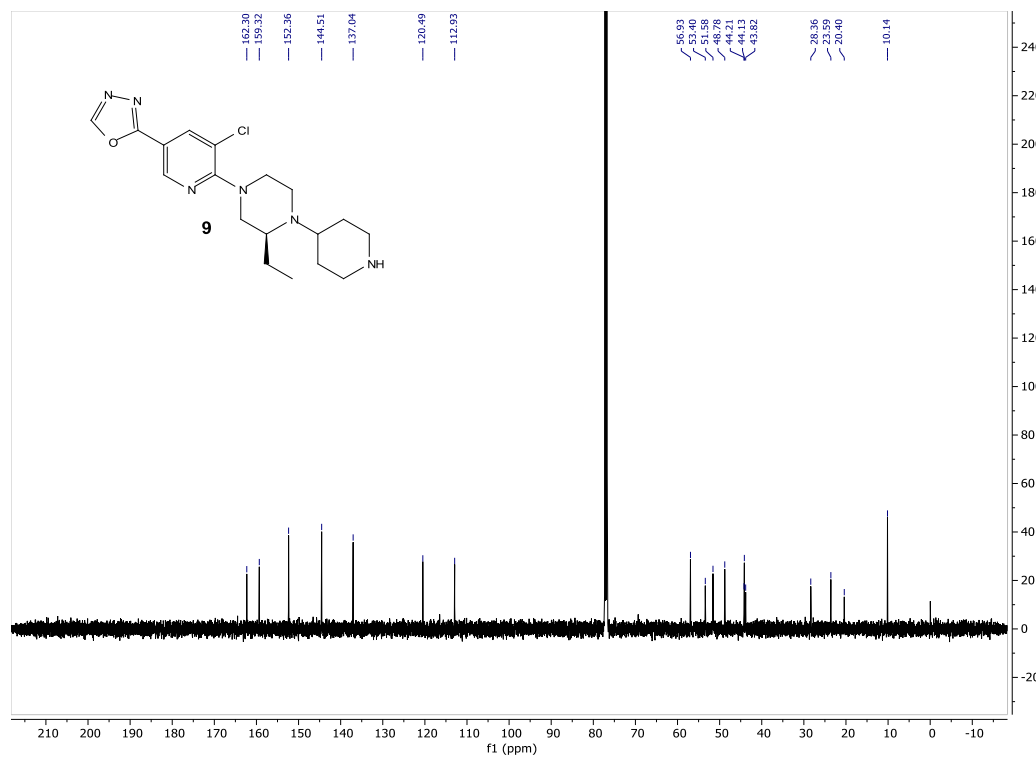

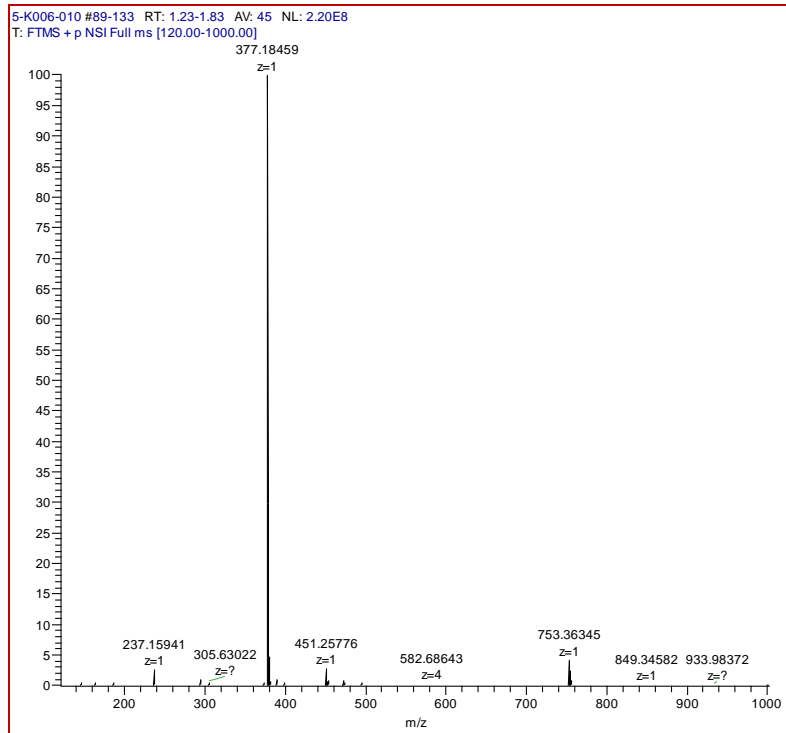

(f) *N*-(4-Chloro-2-fluorobenzyl)-4-piperidinone (12)

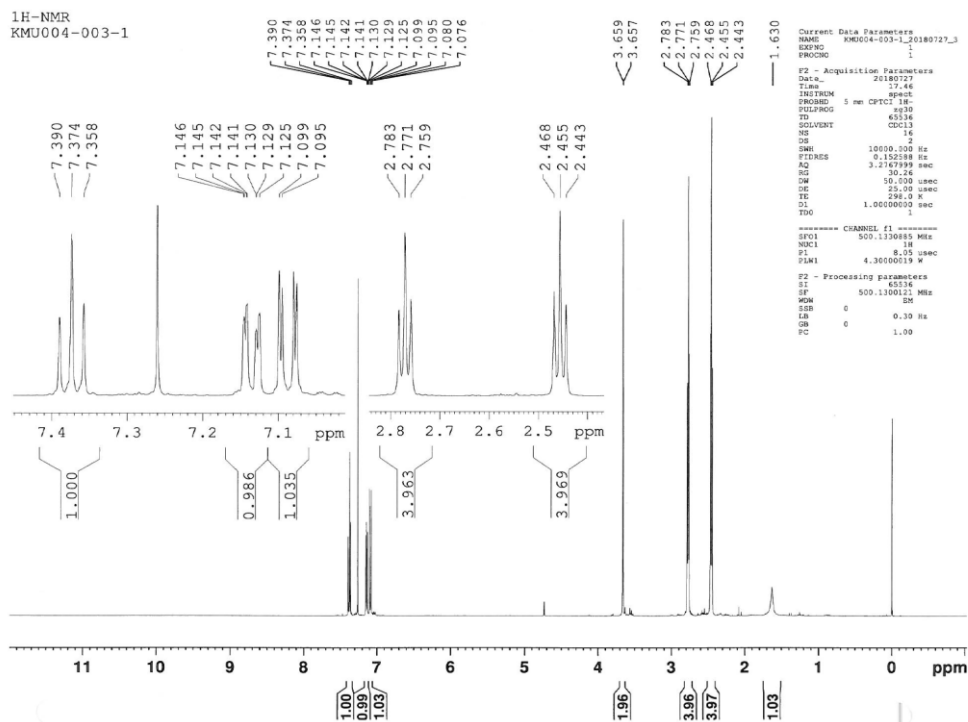

13C-NMR  
KMUQ04-003-1

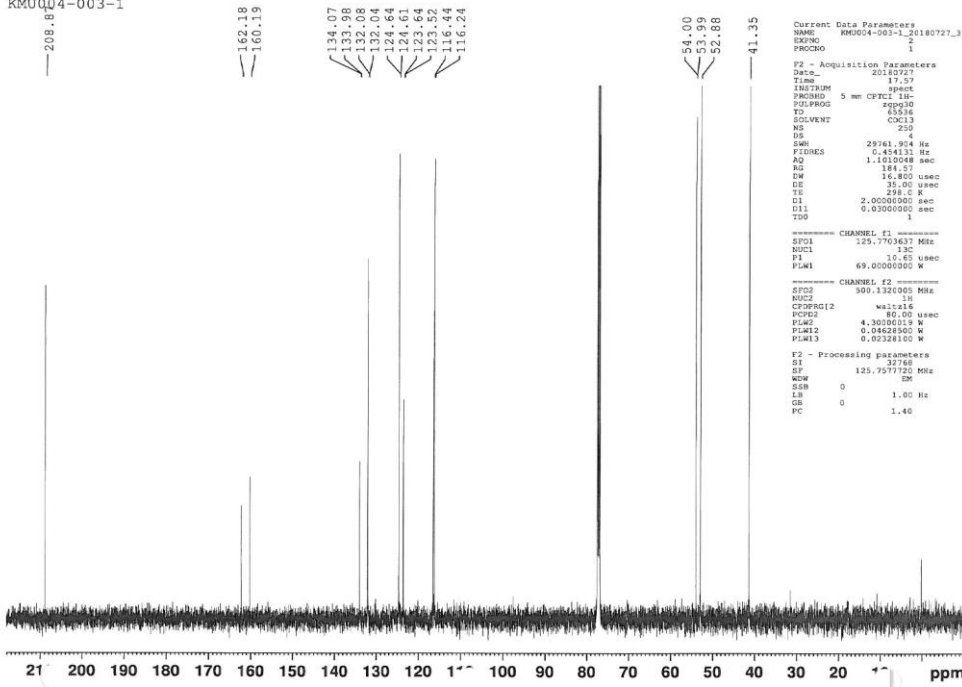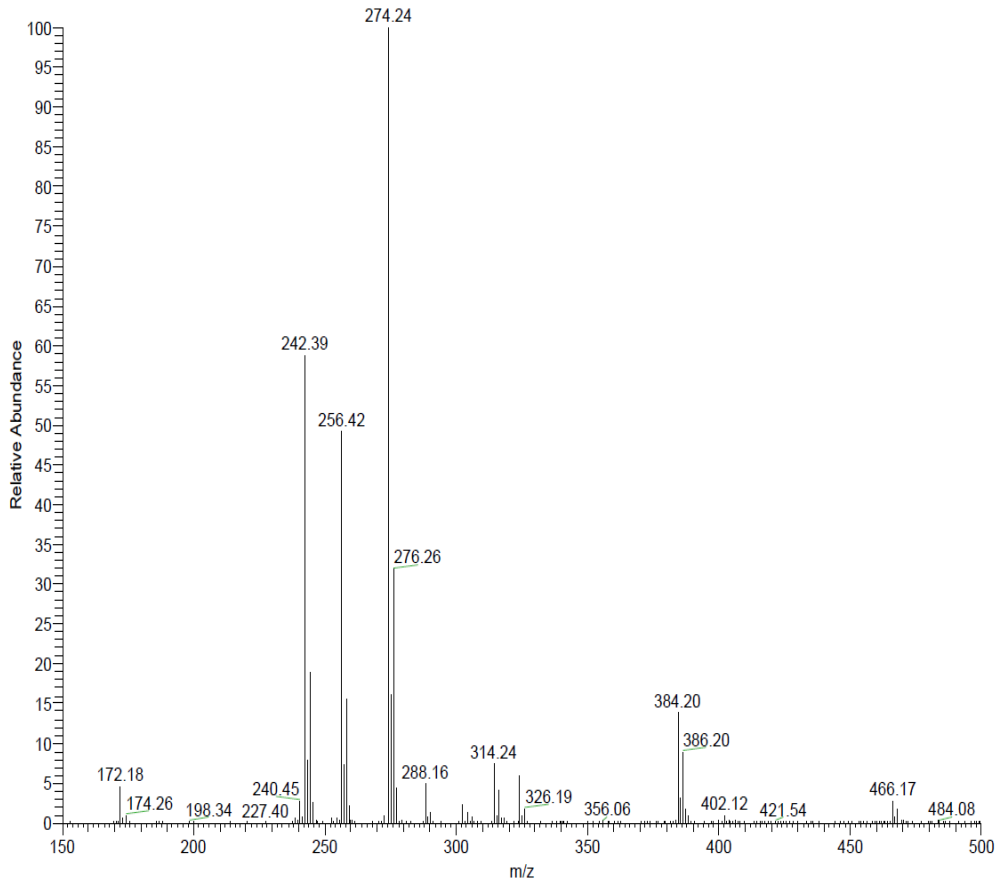

**(g) Methyl (S)-5-chloro-6-(4-(1-(4-chloro-2-fluorobenzyl)piperidin-4-yl)-3-ethylpiperazin-1-yl)nicotinate (13)**

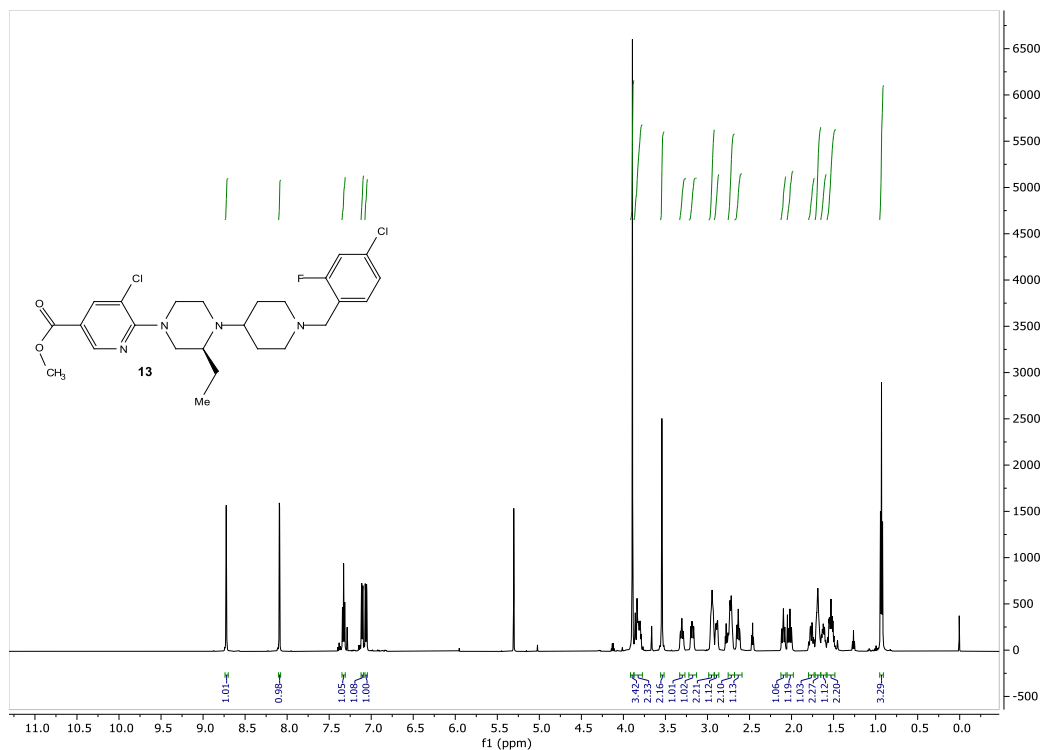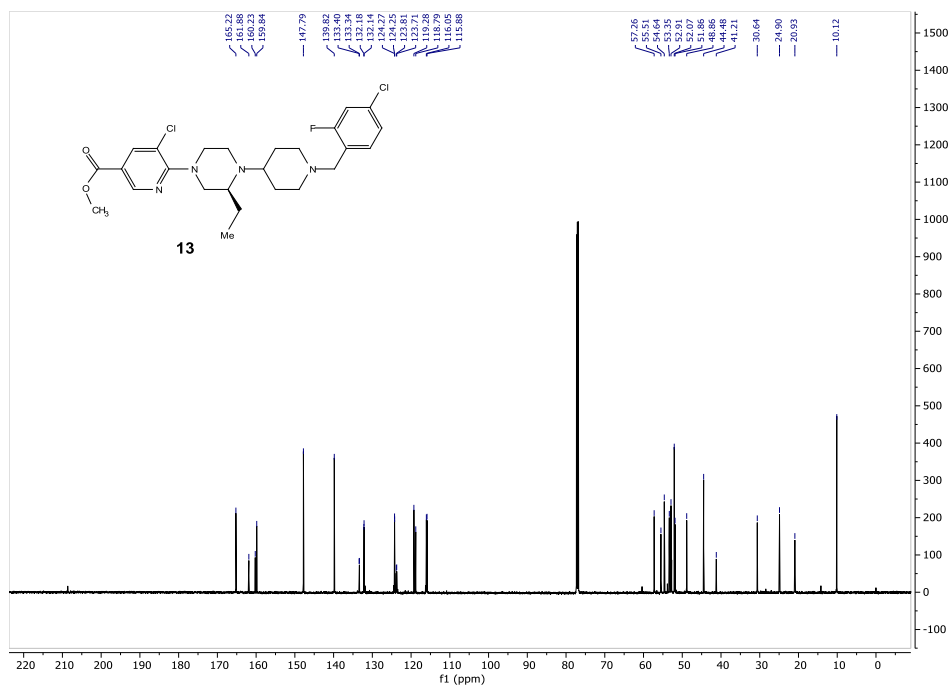

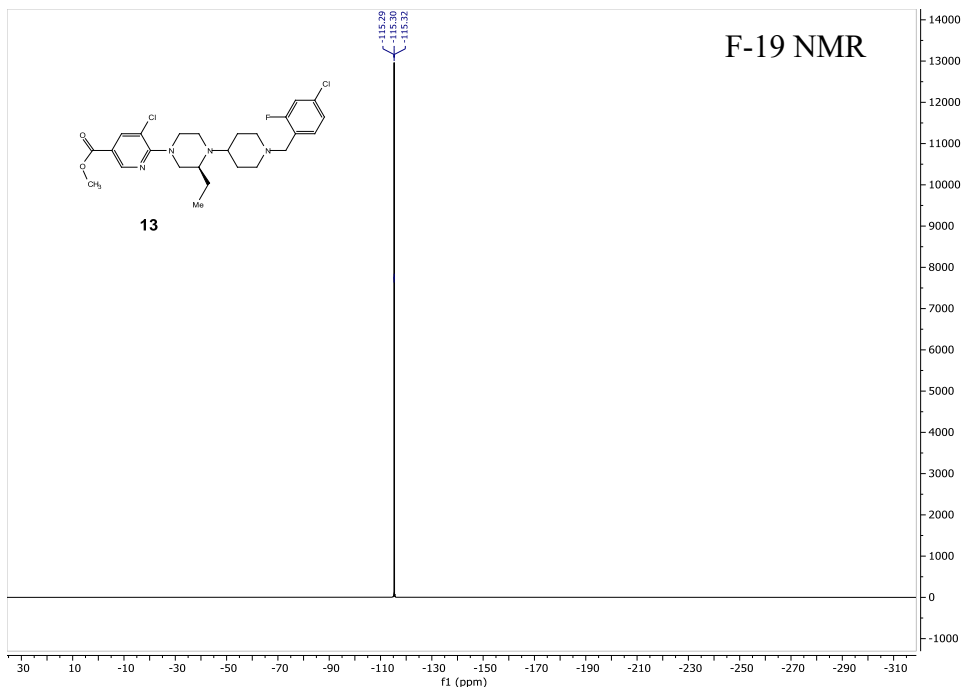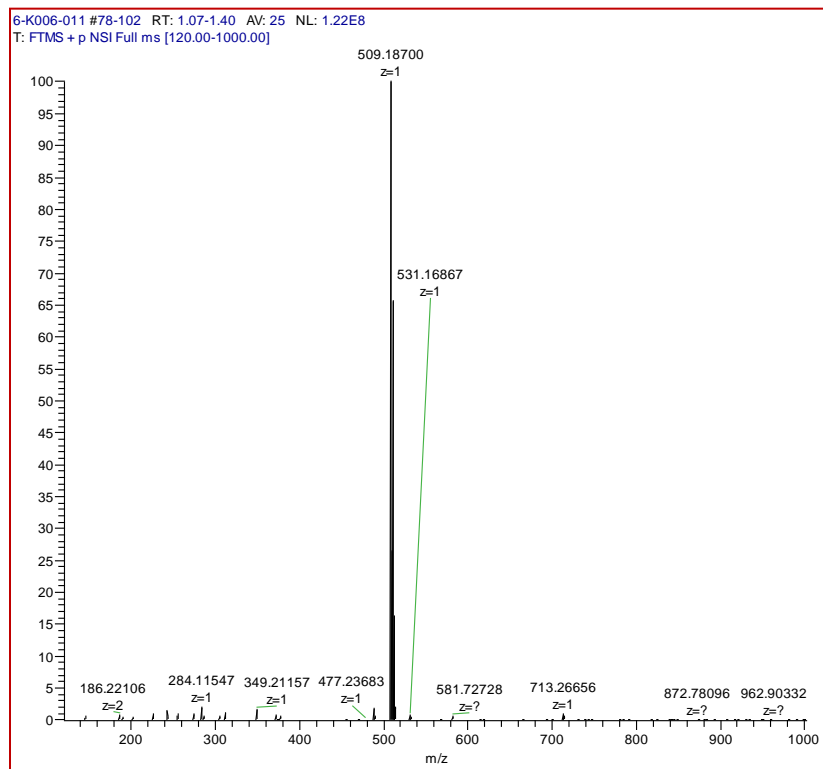

**(h) (S)-2-(5-chloro-6-(4-(1-(4-chloro-2-fluorobenzyl)piperidin-4-yl)-3-ethylpiperazin-1-yl)pyridin-3-yl)-1,3,4-oxadiazole (1)**

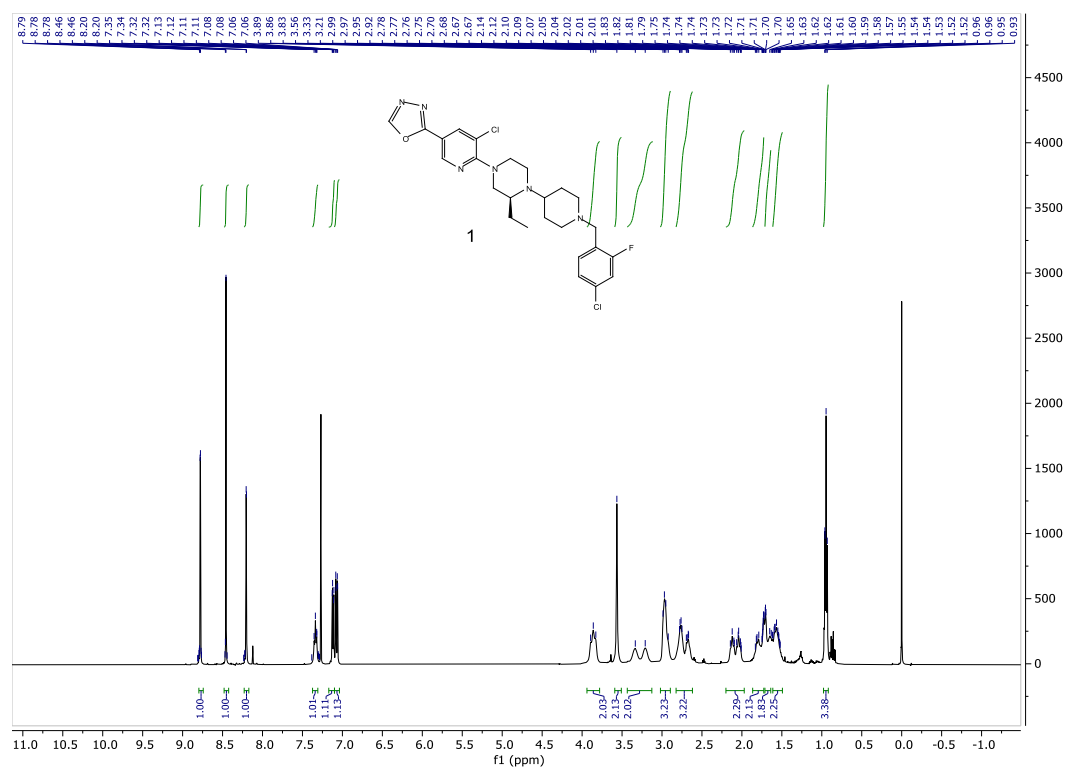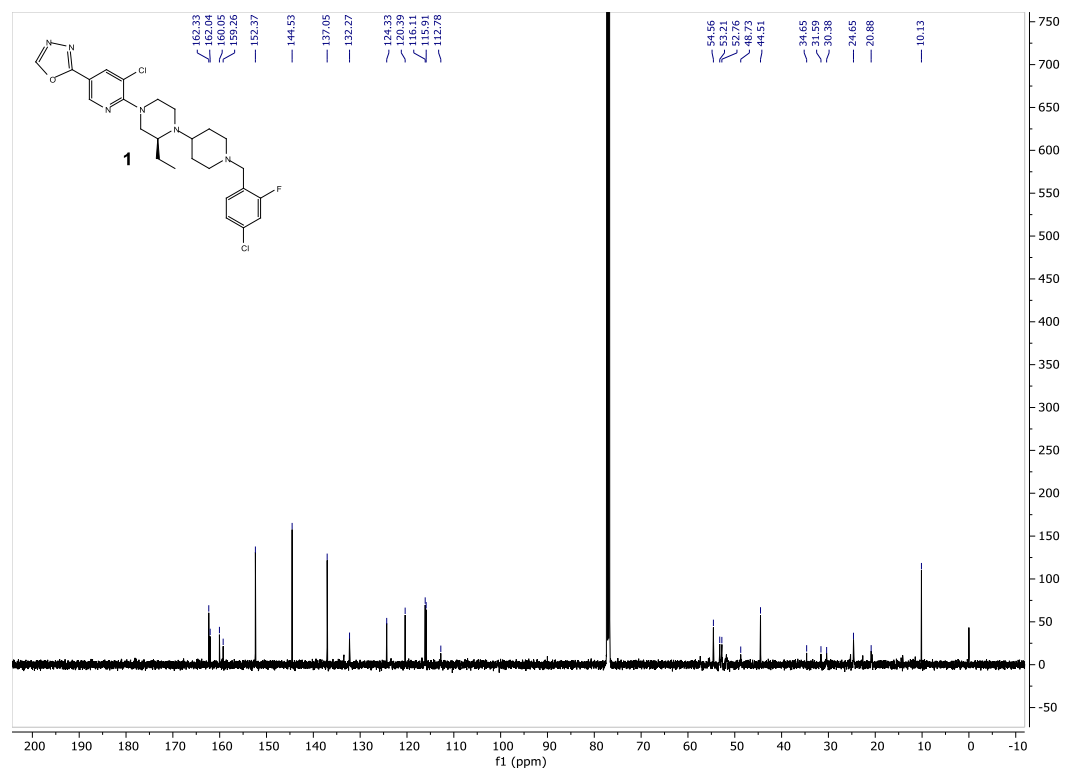

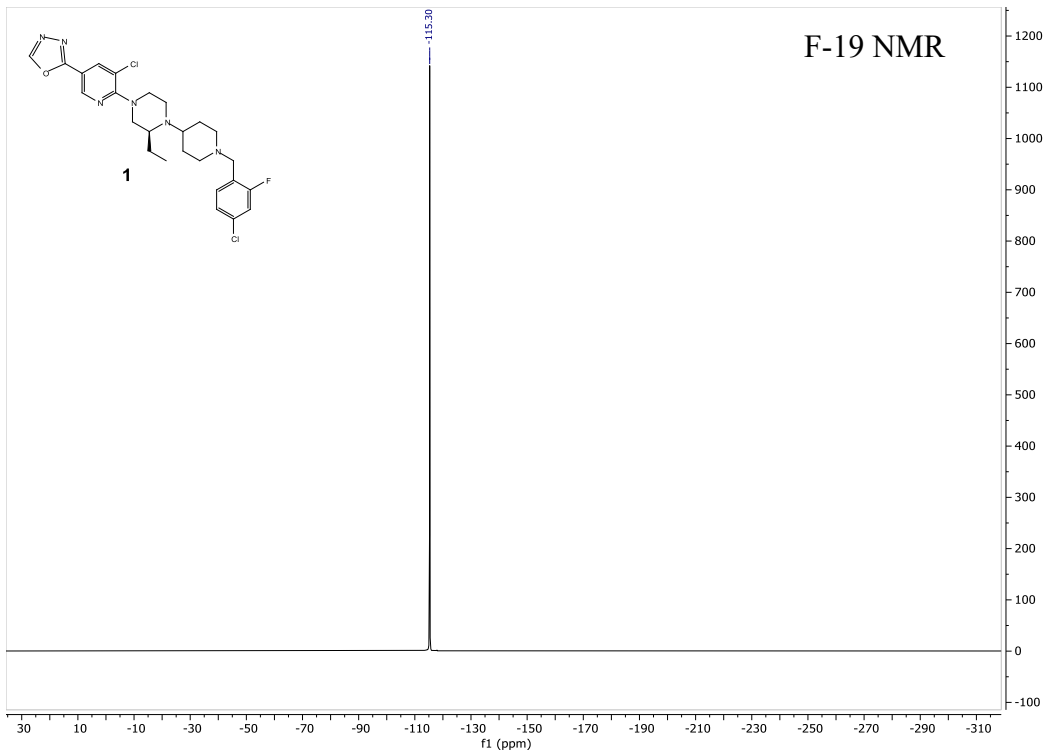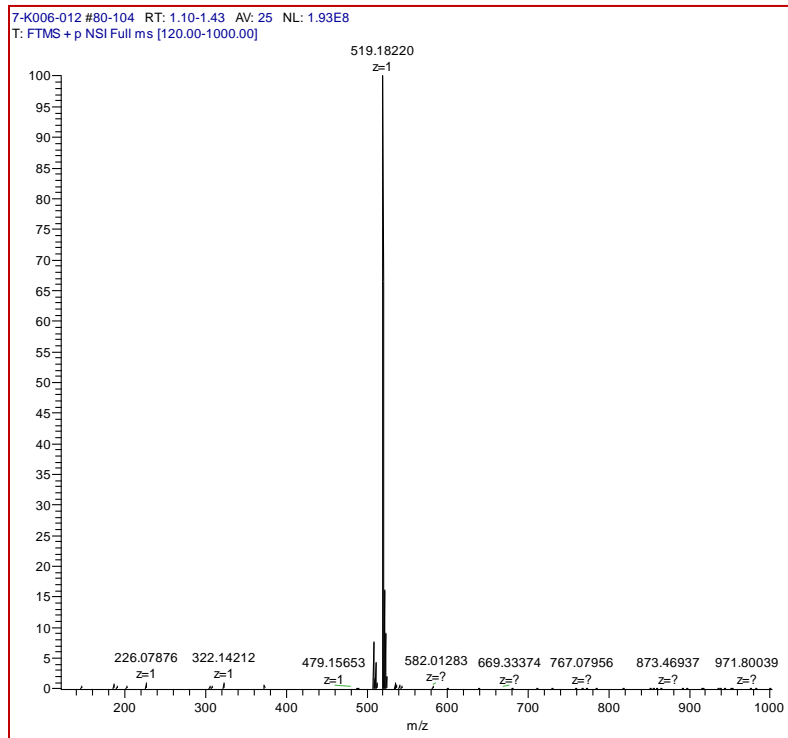

Supplement: MOESM1 [file 25767664]
